# Supplementary material for: Clinical Outcomes and Genome-Wide Association for a Brain Methylation Site in an Antidepressant Pharmacogenetics Study in Mexican Americans
Source: Atypon-hosted journal article supplement (doi:10.1176/appi.ajp.2014.12091165), 2014-12-01
Supplement: appi.ajp.2014.12091165_ds001.pdf [file appi.ajp.2014.12091165_ds001.pdf]

**FIGURE S1. Flowchart of Study Participants, Random Assignment and Dropouts in a Clinical Trial of Desipramine and Fluoxetine Treatment for Mexican-Americans with Major Depressive Disorder**

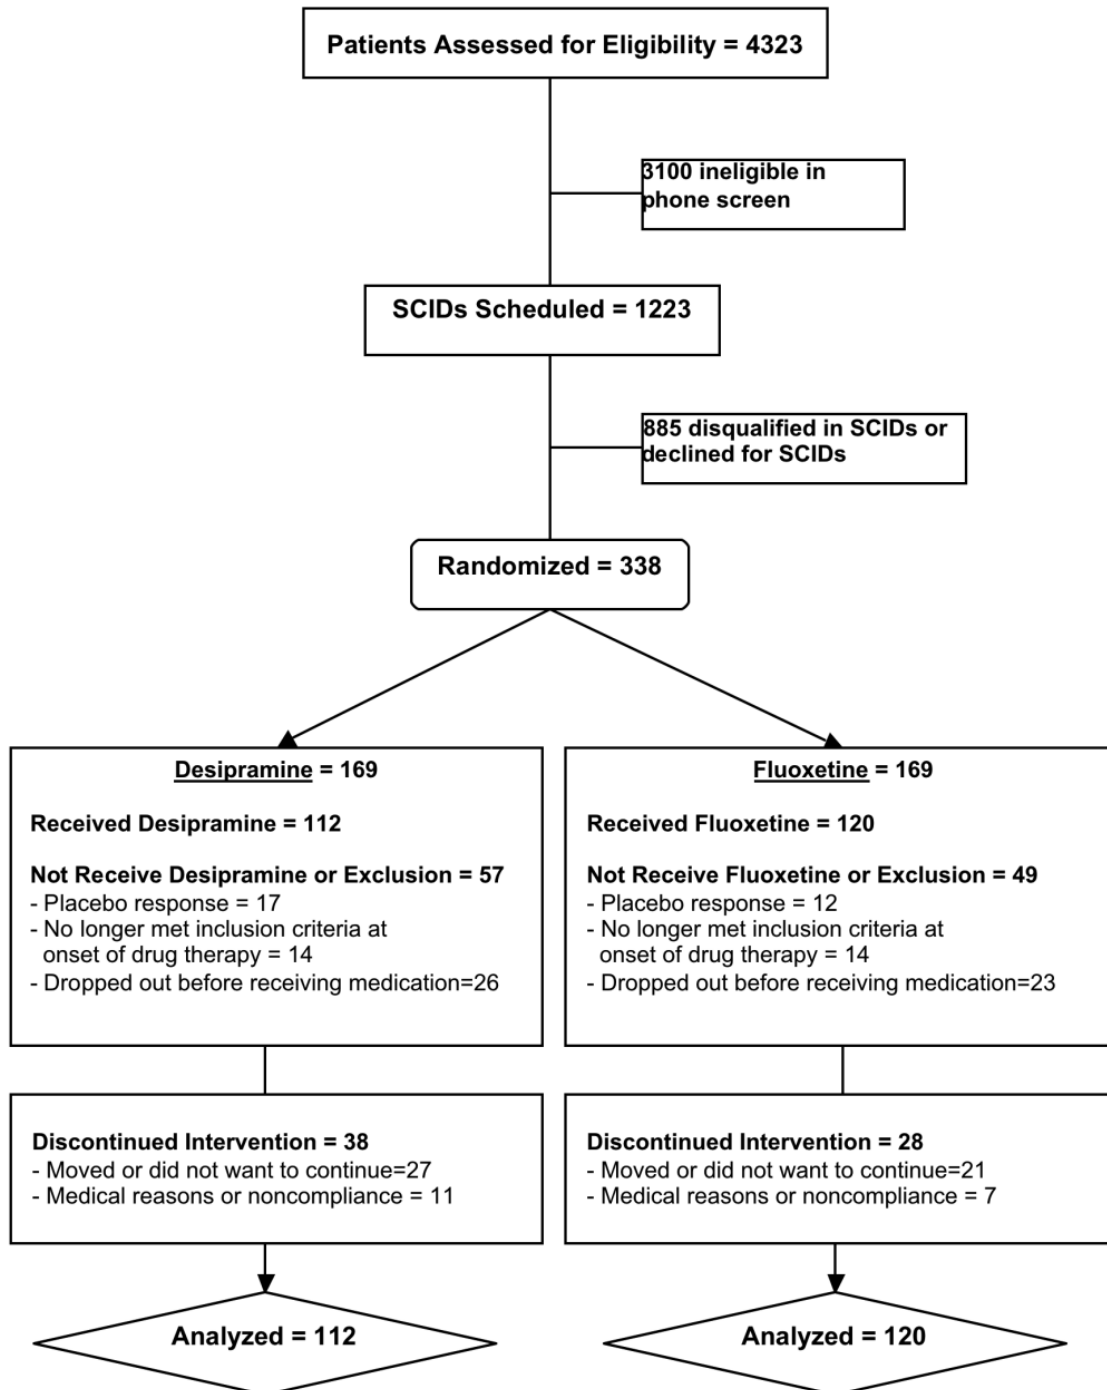

**TABLE S1. Baseline Demographic and Clinical Characteristics of Mexican-American Patients with Major Depression Who Received Desipramine or Fluoxetine**

| Characteristics <sup>a</sup>     | Group               |      |                    |      |
|----------------------------------|---------------------|------|--------------------|------|
|                                  | Desipramine (N=112) |      | Fluoxetine (N=120) |      |
|                                  | N                   | %    | N                  | %    |
| Gender                           |                     |      |                    |      |
| Female                           | 69                  | 61.6 | 84                 | 70.0 |
| Male                             | 43                  | 38.4 | 36                 | 30.0 |
| Education (years)                |                     |      |                    |      |
| Unknown                          | 5                   | 4.5  | 7                  | 5.8  |
| ≤5                               | 19                  | 17.0 | 21                 | 17.5 |
| 6-8                              | 31                  | 27.7 | 41                 | 34.2 |
| 9-12                             | 30                  | 26.8 | 24                 | 20.0 |
| 1-2 college                      | 12                  | 10.7 | 15                 | 12.5 |
| >2 college                       | 15                  | 13.4 | 12                 | 10.0 |
| Generation                       |                     |      |                    |      |
| Unknown                          | 6                   | 5.4  | 5                  | 4.2  |
| 1st generation                   | 100                 | 89.3 | 108                | 90.0 |
| 2nd generation                   | 5                   | 4.5  | 7                  | 5.8  |
| 4th generation                   | 1                   | 0.9  | 0                  | 0.0  |
| Language preference              |                     |      |                    |      |
| Unknown                          | 2                   | 1.8  | 2                  | 1.7  |
| Spanish only                     | 73                  | 65.2 | 79                 | 65.8 |
| Spanish better than English      | 29                  | 25.9 | 20                 | 16.7 |
| Spanish and English equally well | 4                   | 3.6  | 12                 | 10.0 |
| English better than Spanish      | 4                   | 3.6  | 7                  | 5.8  |
|                                  | Mean                | SD   | Mean               | SD   |
| Acculturation score              | 30.9                | 9.4  | 32.5               | 11.2 |
| Age (years)                      | 38.5                | 9.2  | 37.2               | 11.1 |
| HAM-D Score                      | 22.1                | 3.8  | 22.3               | 3.6  |
| HAM-A Score                      | 18.0                | 7.4  | 18.3               | 7.1  |
| BDI Score                        | 23.9                | 10.3 | 24.8               | 9.6  |
| CESD Score                       | 28.6                | 9.7  | 30.1               | 8.4  |
| GAS Score                        | 56.1                | 5.7  | 55.9               | 5.7  |

<sup>a</sup> No significant difference was found between treatment groups with all  $P \geq 0.156$ .

**TABLE S2. Adverse Drug Reactions in Mexican American Patients With Major Depression Treated With Desipramine or Fluoxetine**

| Reaction                           | Desipramine (N=112) |      | Fluoxetine (N=120) |      |
|------------------------------------|---------------------|------|--------------------|------|
|                                    | N                   | %    | N                  | %    |
| General                            | 65                  | 58.0 | 60                 | 50.0 |
| Chills                             | 6                   | 5.4  | 4                  | 3.3  |
| Weight gain                        | 4                   | 3.6  | 8                  | 6.7  |
| Weight loss                        | 6                   | 5.4  | 7                  | 5.8  |
| Perspiration <sup>a</sup>          | 24                  | 21.4 | 14                 | 11.7 |
| Flushing                           | 8                   | 7.1  | 5                  | 4.2  |
| Nocturia                           | 2                   | 1.8  | 5                  | 4.2  |
| Drowsiness                         | 20                  | 17.9 | 25                 | 20.8 |
| Dizziness                          | 41                  | 36.6 | 32                 | 26.7 |
| Chest pain                         | 13                  | 11.6 | 8                  | 6.7  |
| Psychiatric                        | 32                  | 28.6 | 35                 | 29.2 |
| Disorientation                     | 2                   | 1.8  | 4                  | 3.3  |
| Delusions                          | 3                   | 2.7  | 0                  | 0.0  |
| Anxiety/irritability               | 15                  | 13.4 | 21                 | 17.5 |
| Restlessness                       | 10                  | 8.9  | 9                  | 7.5  |
| Agitations                         | 8                   | 7.1  | 11                 | 9.2  |
| Sleep alterations                  | 14                  | 12.5 | 20                 | 16.7 |
| Bruxism                            | 0                   | 0.0  | 4                  | 3.3  |
| Neurologic                         | 45                  | 40.2 | 43                 | 35.8 |
| Numbness                           | 5                   | 4.5  | 2                  | 1.7  |
| Tingling/parasthesias <sup>b</sup> | 15                  | 13.4 | 6                  | 5.0  |
| Incoordination                     | 1                   | 0.9  | 2                  | 1.7  |
| Tremors                            | 8                   | 7.1  | 3                  | 2.5  |
| Seizures                           | 1                   | 0.9  | 0                  | 0.0  |
| Tinnitus                           | 4                   | 3.6  | 6                  | 5.0  |
| Headaches                          | 28                  | 25.0 | 35                 | 29.2 |
| Myalgia                            | 10                  | 8.9  | 9                  | 7.5  |
| Allergic                           | 27                  | 24.1 | 23                 | 19.2 |
| Skin rash                          | 4                   | 3.6  | 6                  | 5.0  |
| Urticaria                          | 7                   | 6.3  | 8                  | 6.7  |
| Itching (skin or eyes)             | 19                  | 17.0 | 17                 | 14.2 |
| Photosensitization                 | 1                   | 0.9  | 2                  | 1.7  |
| Edema                              | 1                   | 0.9  | 0                  | 0.0  |
| Endocrine                          | 8                   | 7.1  | 8                  | 6.7  |
| Change in libido                   | 5                   | 4.5  | 6                  | 5.0  |
| Impotence                          | 0                   | 0.0  | 4                  | 3.3  |
| Change in sexual function          | 3                   | 2.7  | 5                  | 4.2  |
| Cardiovascular <sup>c</sup>        | 32                  | 28.6 | 17                 | 14.2 |
| Hypotension                        | 4                   | 3.6  | 1                  | 0.8  |
| Hypertension                       | 6                   | 5.4  | 4                  | 3.3  |
| Palpitations <sup>d</sup>          | 25                  | 22.3 | 13                 | 10.8 |
| Heart block                        | 1                   | 0.9  | 0                  | 0.0  |

|                                                 |    |      |    |      |
|-------------------------------------------------|----|------|----|------|
| Anticholinergic <sup>b</sup>                    | 74 | 66.1 | 62 | 51.7 |
| Dry mouth                                       | 46 | 41.1 | 35 | 29.2 |
| Blurred vision <sup>a</sup>                     | 19 | 17.0 | 9  | 7.5  |
| Disturbance of accommodation                    | 1  | 0.9  | 1  | 0.8  |
| Mydriasis                                       | 0  | 0.0  | 1  | 0.8  |
| Pressure-like sensation in eyes                 | 3  | 2.7  | 2  | 1.7  |
| Constipation                                    | 30 | 26.8 | 20 | 16.7 |
| Paralytic ileus                                 | 0  | 0.0  | 2  | 1.7  |
| Urinary retention                               | 1  | 0.9  | 1  | 0.8  |
| Delayed micturation                             | 1  | 0.9  | 1  | 0.8  |
| Urinary frequency                               | 9  | 8.0  | 7  | 5.8  |
| Knot sensation in throat                        | 9  | 8.0  | 6  | 5.0  |
| Orthostatic hypotension (by pulse) <sup>a</sup> | 21 | 18.8 | 11 | 9.2  |
| Arrhythmias/bradycardia/tachycardia             | 9  | 8.0  | 6  | 5.0  |
| Gastrointestinal                                | 45 | 40.2 | 50 | 41.7 |
| Change in appetite                              | 15 | 13.4 | 18 | 15.0 |
| Nausea                                          | 24 | 21.4 | 25 | 20.8 |
| Vomiting                                        | 6  | 5.4  | 2  | 1.7  |
| Epigastric distress/dyspepsia                   | 19 | 17.0 | 16 | 13.3 |
| Abdominal cramps/bloating                       | 9  | 8.0  | 13 | 10.8 |
| Diarrhea                                        | 3  | 2.7  | 5  | 4.2  |
| Metallic taste in mouth                         | 5  | 4.5  | 4  | 3.3  |
| Sexual                                          | 8  | 7.1  | 12 | 10.0 |
| Male (N=79)                                     |    |      |    |      |
| Lack of interest in sex                         | 3  | 2.7  | 5  | 4.2  |
| Impotence                                       | 5  | 4.5  | 7  | 5.8  |
| Premature ejaculation                           | 3  | 2.7  | 6  | 5.0  |
| Difficulty achieving orgasm                     | 0  | 0.0  | 5  | 4.2  |
| Female (N=153)                                  | 5  | 4.5  | 9  | 7.5  |
| Lack of interest in sex                         | 4  | 3.6  | 6  | 5.0  |
| Inability to achieve orgasm                     | 0  | 0.0  | 4  | 3.3  |
| Difficulty achieving orgasm                     | 1  | 0.9  | 5  | 4.2  |
| Any side effects                                | 90 | 80.4 | 92 | 76.7 |

<sup>a</sup> Significant difference between treatment groups, p<0.05.

<sup>b</sup> Significant difference between treatment groups, p<0.01.

**FIGURE S2. A.** Classification errors curves obtained by the TreeNet analyses for the training and the test samples. After 150 trees, classification error rates fell down than 10% and remain very stables in both samples. **B.** ROC curves obtained for 200 trees showing that ROC integrals for the training and the test samples are higher than 0.90 after the analysis of 150 trees, and they remain very stable, replicating what was found for the classification error rates and from the CART analyses. **C.** Importance of variables for prediction as defined by the random forest method. These variables replicate what was found by the Exome-Wide Association and CART analyses that found the variant *exm-rs1321744* as the one with the highest importance in predicting remission of major depression symptoms.

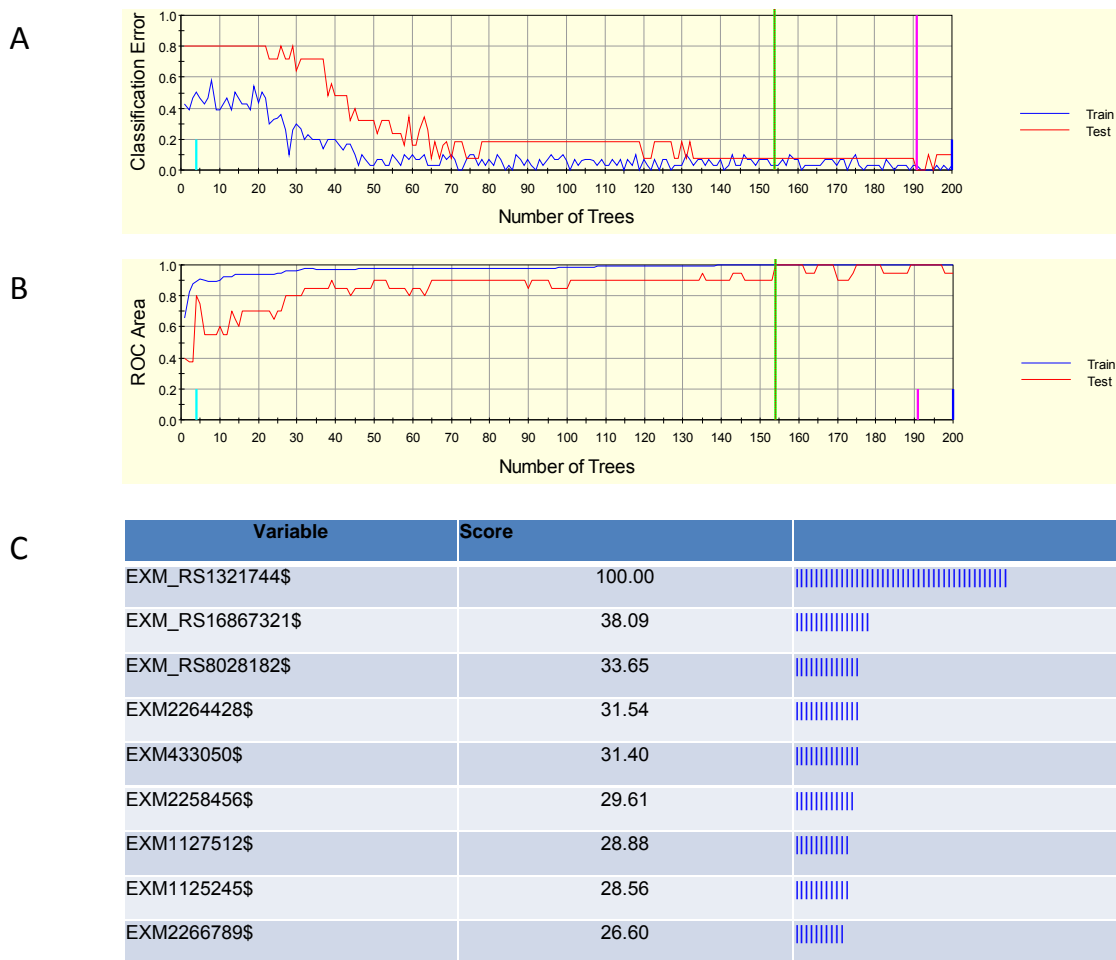

**TABLE S3. Differences Between Completers Who Were Genotyped and Who Were Not Genotyped**

| <b>Variable</b>                         | <b>Completer w/genotype<br/>(n=65)</b> | <b>Completer w/o genotype<br/>(n=101)</b> | <b>P</b>            |
|-----------------------------------------|----------------------------------------|-------------------------------------------|---------------------|
| <b>Gender (%)</b>                       |                                        |                                           |                     |
| Male/Female                             | 31/69                                  | 36/64                                     | 0.5168              |
| <b>Medication (%)</b>                   |                                        |                                           |                     |
| Fluoxetine/Desipramine                  | 54/46                                  | 56/44                                     | 0.7432              |
| <b>Age (mean±SD)</b>                    | 40.8±10.9                              | 37.4±9.6                                  | 0.0381 <sup>a</sup> |
| <b>Week 8 HAM-D score<br/>(mean±SD)</b> | 8.2±5.3                                | 8.5±5.5                                   | 0.6920              |

<sup>a</sup> Significant difference between completer groups ( $P < 0.05$  by Student-t test).
